# Supplementary material for: Shell Shape Analysis and Spatial Allometry Patterns of Manila Clam (Ruditapes philippinarum) in a Mesotidal Coastal Lagoon
Source: Hindawi journal article supplement (doi:10.1155/2012/281206), 2012-01-01
Supplement: f1 [file 281206.f1.docx]

**Supplementary material - Table**

Allometric relations for pairs of parameters or shape descriptors [Length (*L* ), Height (*H*), Width (*W*), Shell Mass (*SM*), Circle index lateral view (*CIL*) defined as *CIL = AL/0.25*L²*π* with AL Area Lateral of the valve, Circle index ventral view (*CIV*) defined as *CIV = 2*AV/0.25*LVent²*π* with AV Area Ventral of the valve, Ellipse index lateral view (*EIL*) defined as *EIL = AL/0.25*L²*π*, Ellipse index ventral view (*EIV*) defined as *EIV = 2*AS/0.25*LVent²*π*, Elongation index (*H/L*), Compactness index (*W/L*), Convexity index (*W/H*), Weight ratio 1 (*SM/L*), Weight ratio 2 (*SM/H*), Weight ratio 3 (*SM/W*)], r² determination coefficient

| Allometric relations | Equation | Coefficients | | r² | Allometry |
| --- | --- | --- | --- | --- | --- |
|  |  | a | b |  |  |
| *H* related to *L* | *LnH = a + bLnL* | - 0.298 | 1.008 | **0.972** | Isometry |
| *W* related to *L*. | *LnW = a + bLnL* | -1.427 | 1.149 | **0.902** | Positive |
| *W* related to *H*. | *LnW = a + bLnH* | -1.084 | 1.135 | **0.921** | Positive |
| *SM* related to *L* | *LnSM = a + bLnL* | - 2.917 | 3.271 | **0.912** | Positive |
| *SM* related to *H* | *LnSM = a + bLnH* | - 1.918 | 3.201 | **0.923** | Positive |
| *SM* related to *W* | *LnSM = a + bLnW* | 1.099 | 2.732 | **0.934** | Positive |
| *CIL* related to *L* | *LnCIL = a + bLnL* | - 0.318 | 0.010 | 0.004 | / |
| *EIL* related to *L* | *LnEIL = a + bLnL* | + 0.374 | 0.010 | 0.004 | / |
| *CIV* related to *L* | *LnCIV = a + bLnL* | - 0.867 | 0.124 | 0.080 | / |
| *EIV* related to *L* | *LnEIV = a + bLnL* | - 0.187 | 0.016 | 0.010 | / |
| *H/L* related to *L* | *LnH/L = a + bLnL* | - 0.298 | 0.008 | 0.002 | / |
| *W/L* related to *L* | *LnW/L = a + bLnL* | + 0.238 | 0.041 | 0.130 | / |

Bold = significant correlation
